# Supplementary material for: Plant neighbour-modulated susceptibility to pathogens in intraspecific mixtures
Source: PubMed Central journal article supplement (PMC8483782; doi:10.1093/jxb/erab277), 2021-06-14
Supplement: erab277_suppl_supplementary_data.pdf [file erab277_suppl_supplementary_data.pdf]

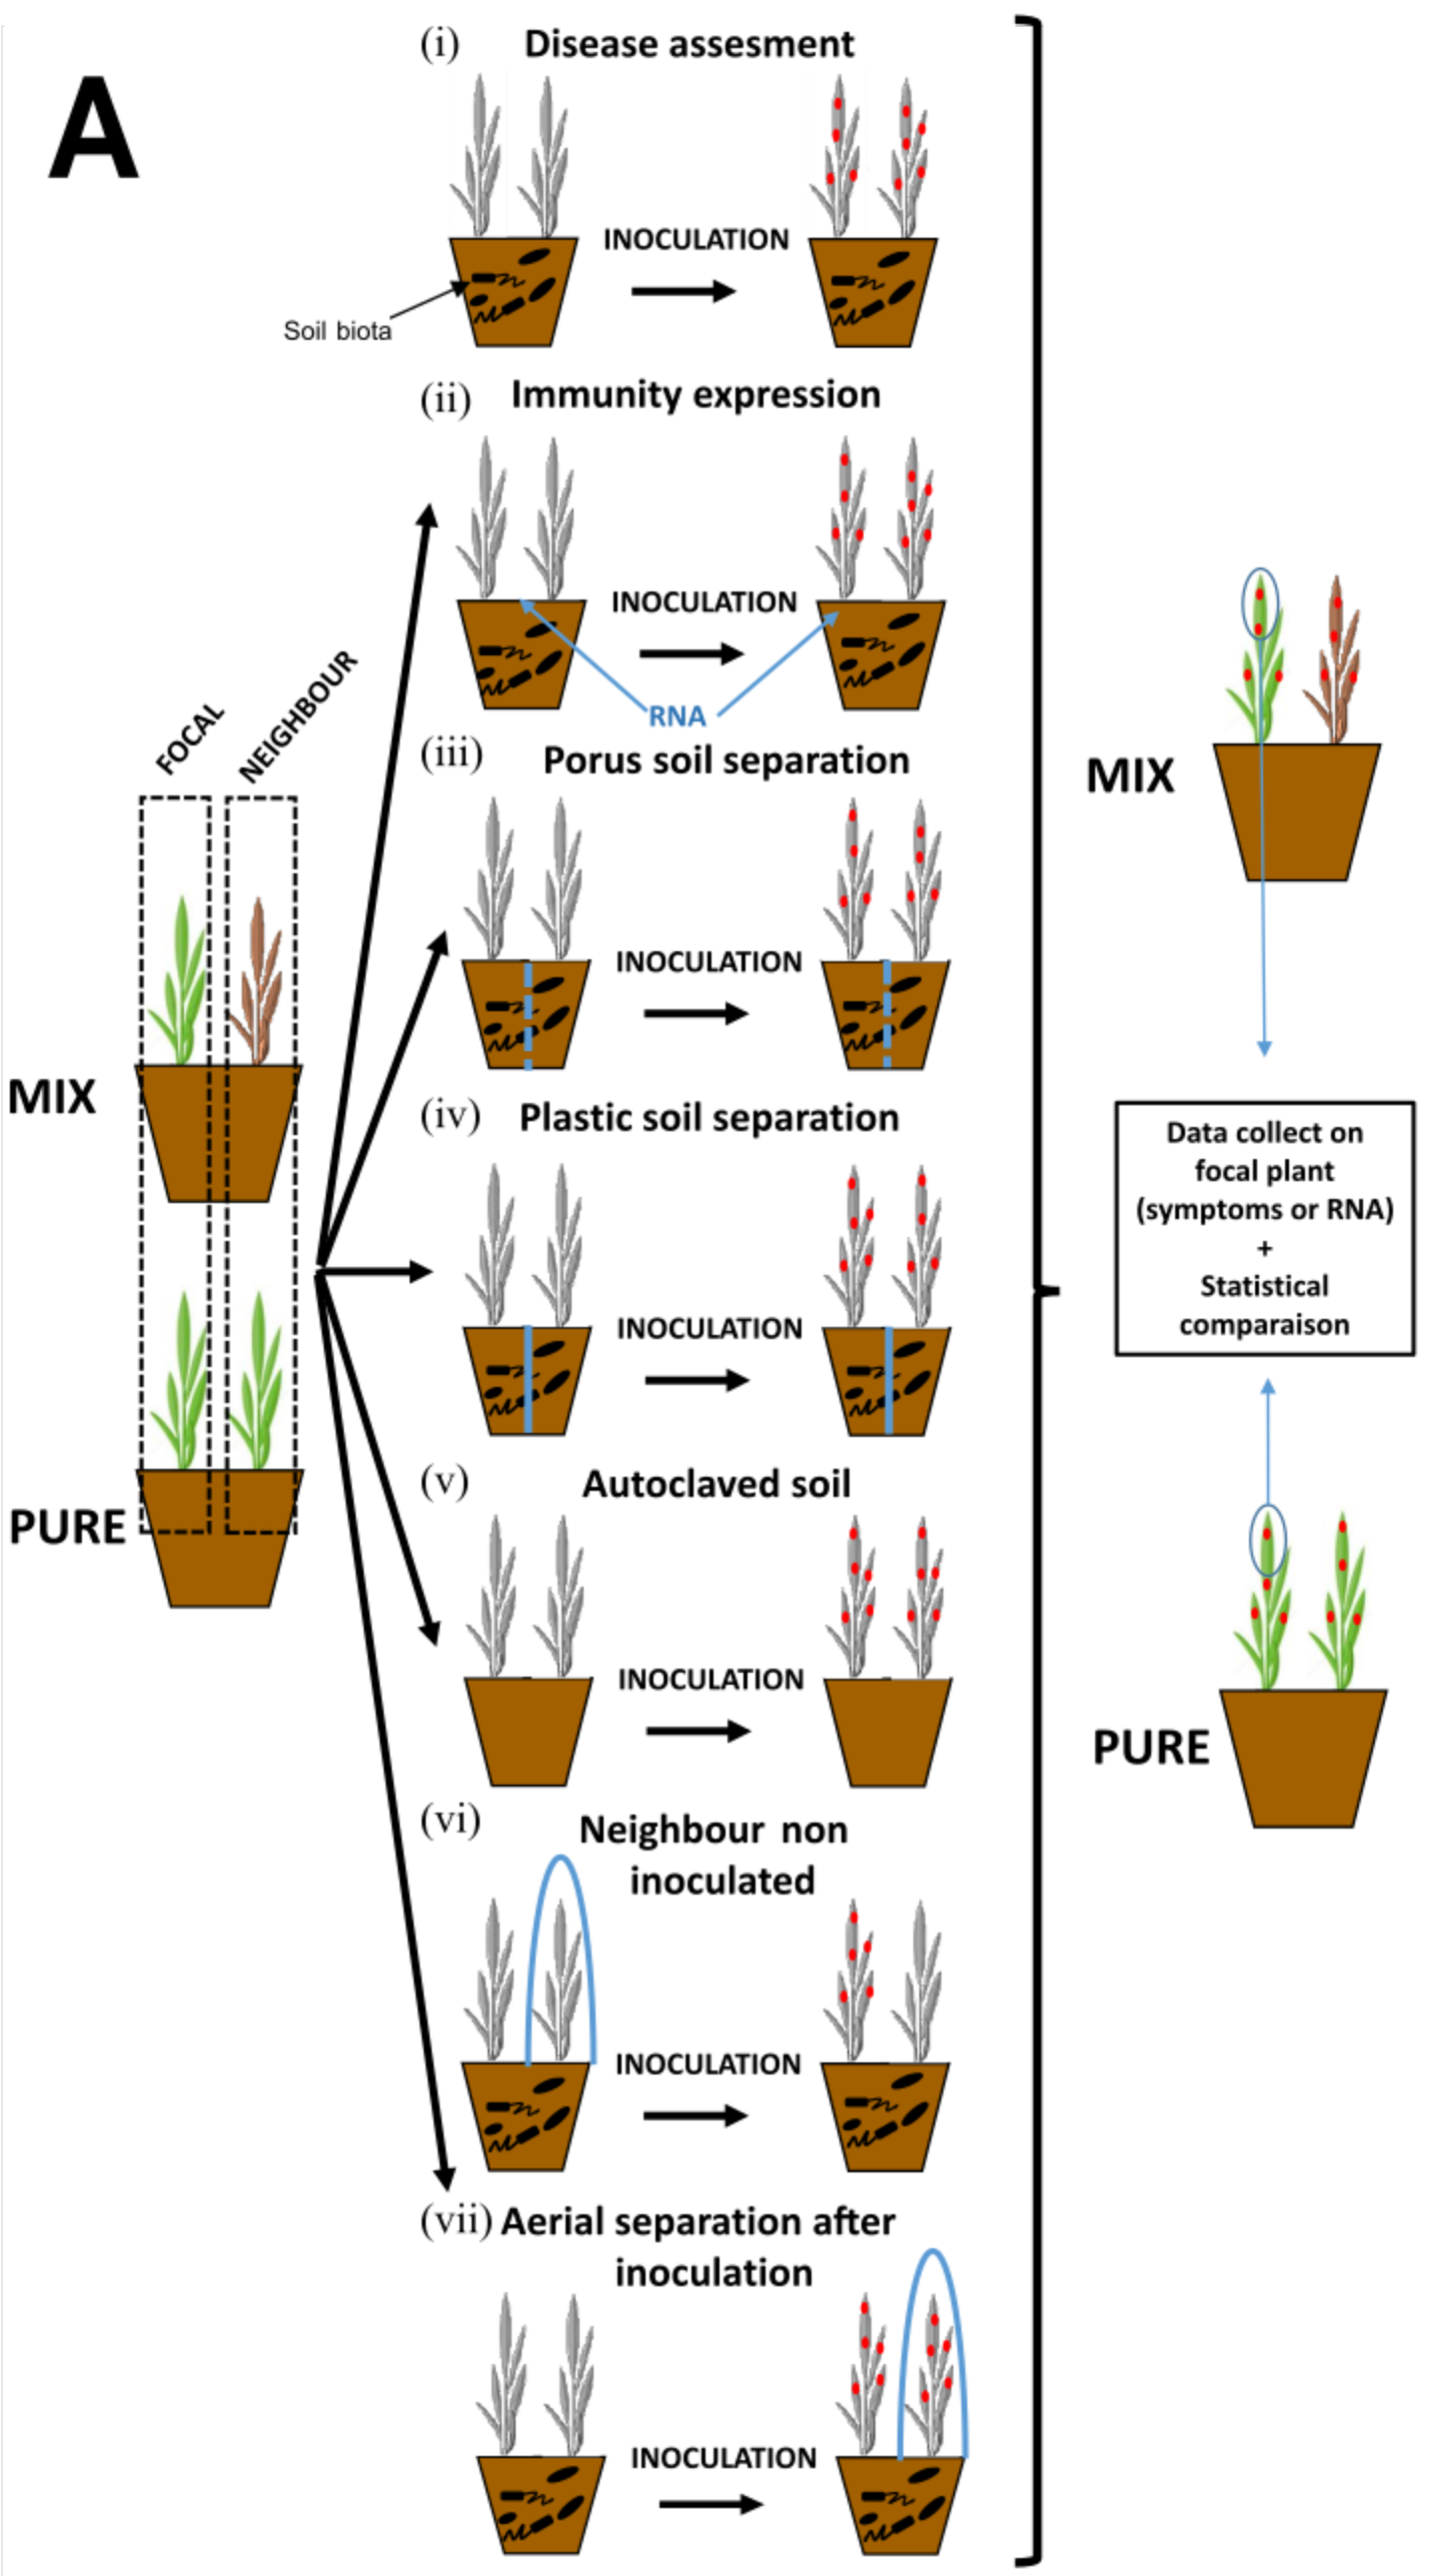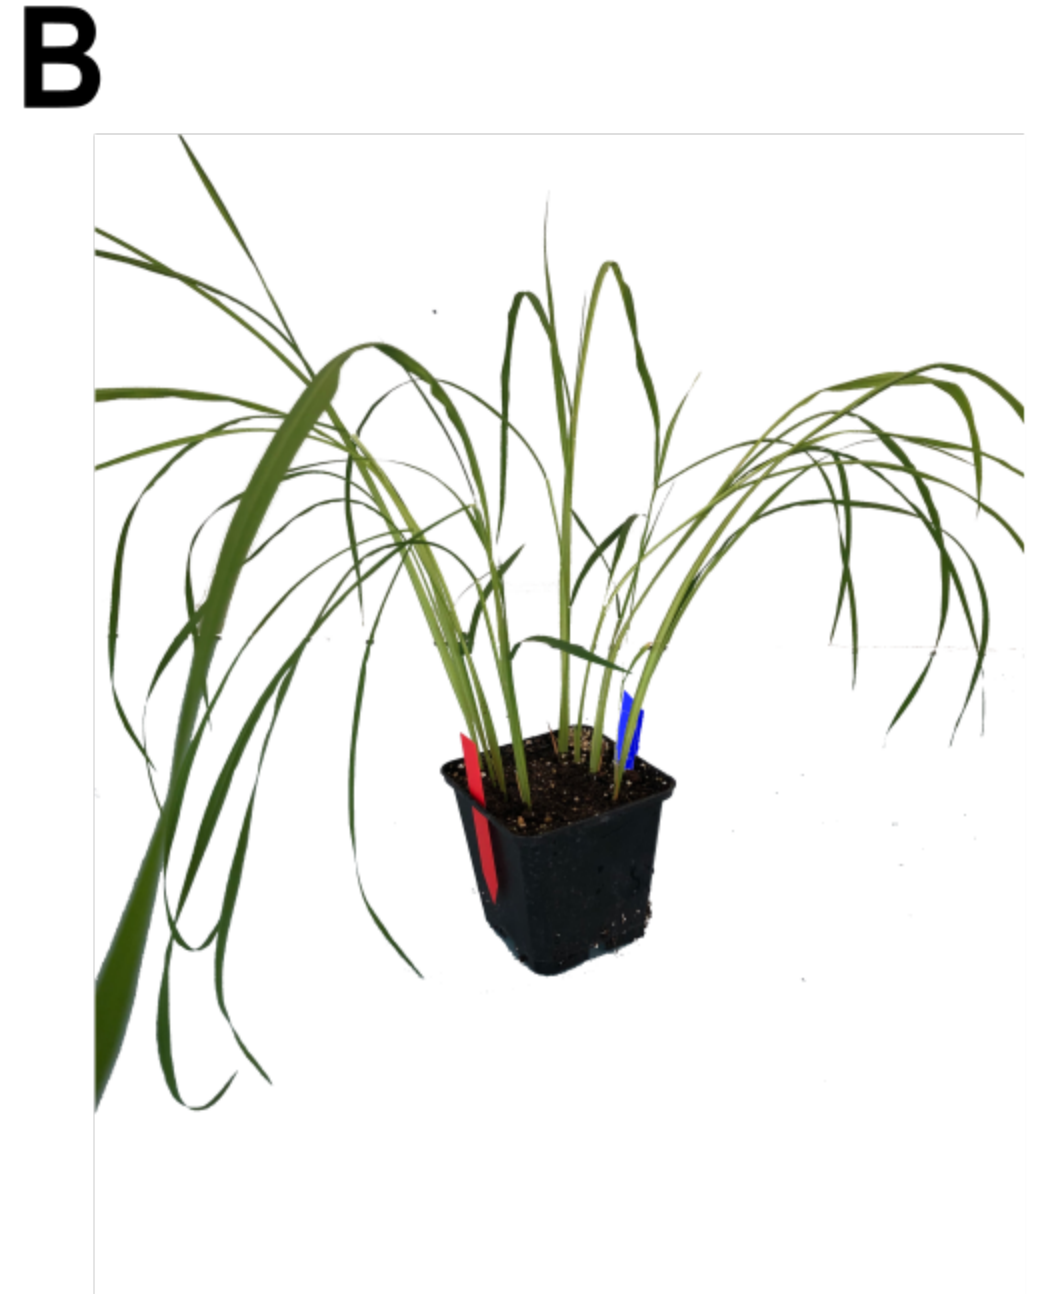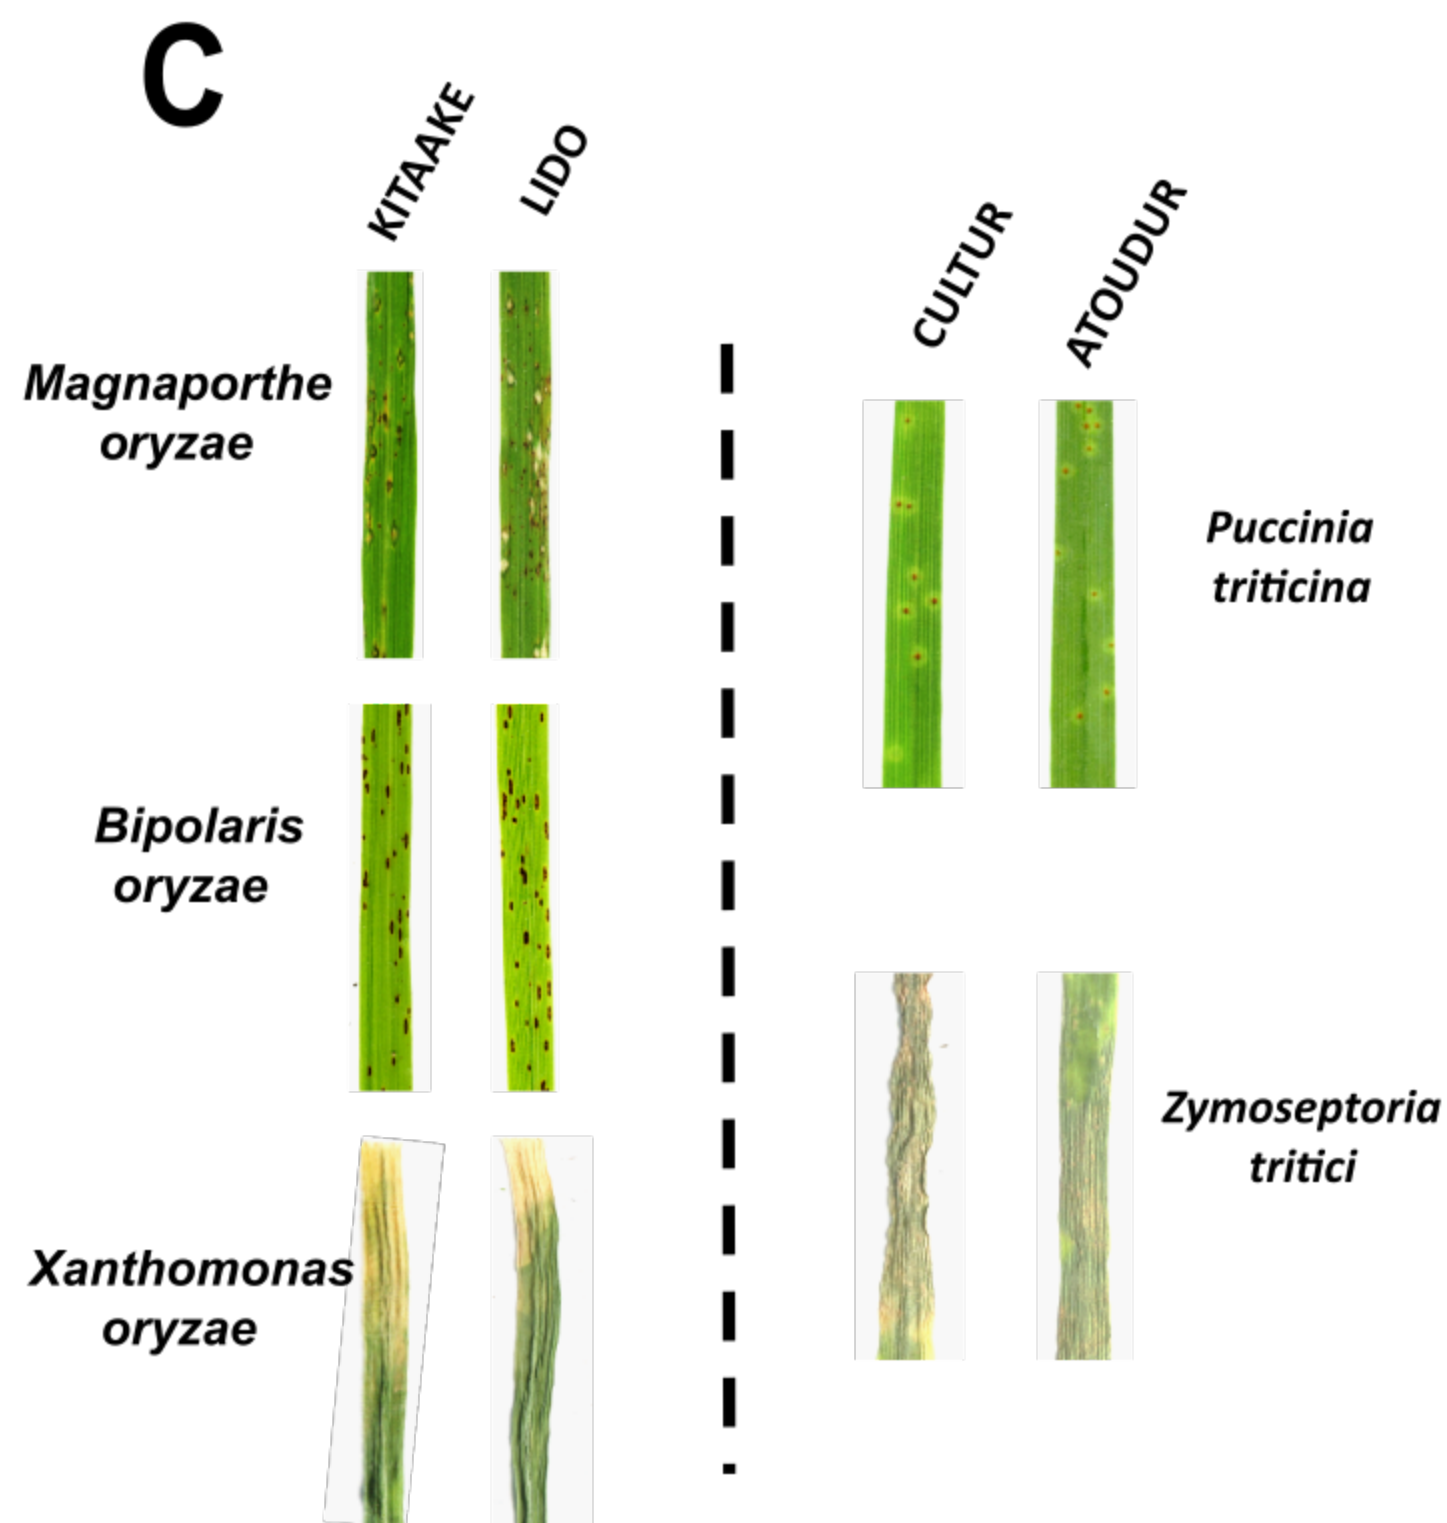

**Fig. S1 Overall experimental design used in this study.**

(A). Two model mixtures (KITAAKE/LIDO for rice and CULTUR/ATOUDUR for wheat) were selected. Each mixture and pure condition was used for several measurements and treatments: (i) Disease assessment with various pathogens, (ii) RNA harvesting for analysis of defense gene expression before and after inoculation, (iii) porus soil separation, (iv) plastic soil separation, (v) autoclaved soil, (vi) non inoculation of the neighbour and (vii) aerial separation after inoculation between focal and neighbour. For all the experiments, symptoms (e.g number of lesions) or RNA were analyzed on the last developed leaf of the focal plant. Results of the focal plant in pure and mix condition were compared with the appropriate statistics.

(B). Example of set-up with two rice lines of plant used in one pot.

(C) Examples of leaf symptoms quantified by the pathogens

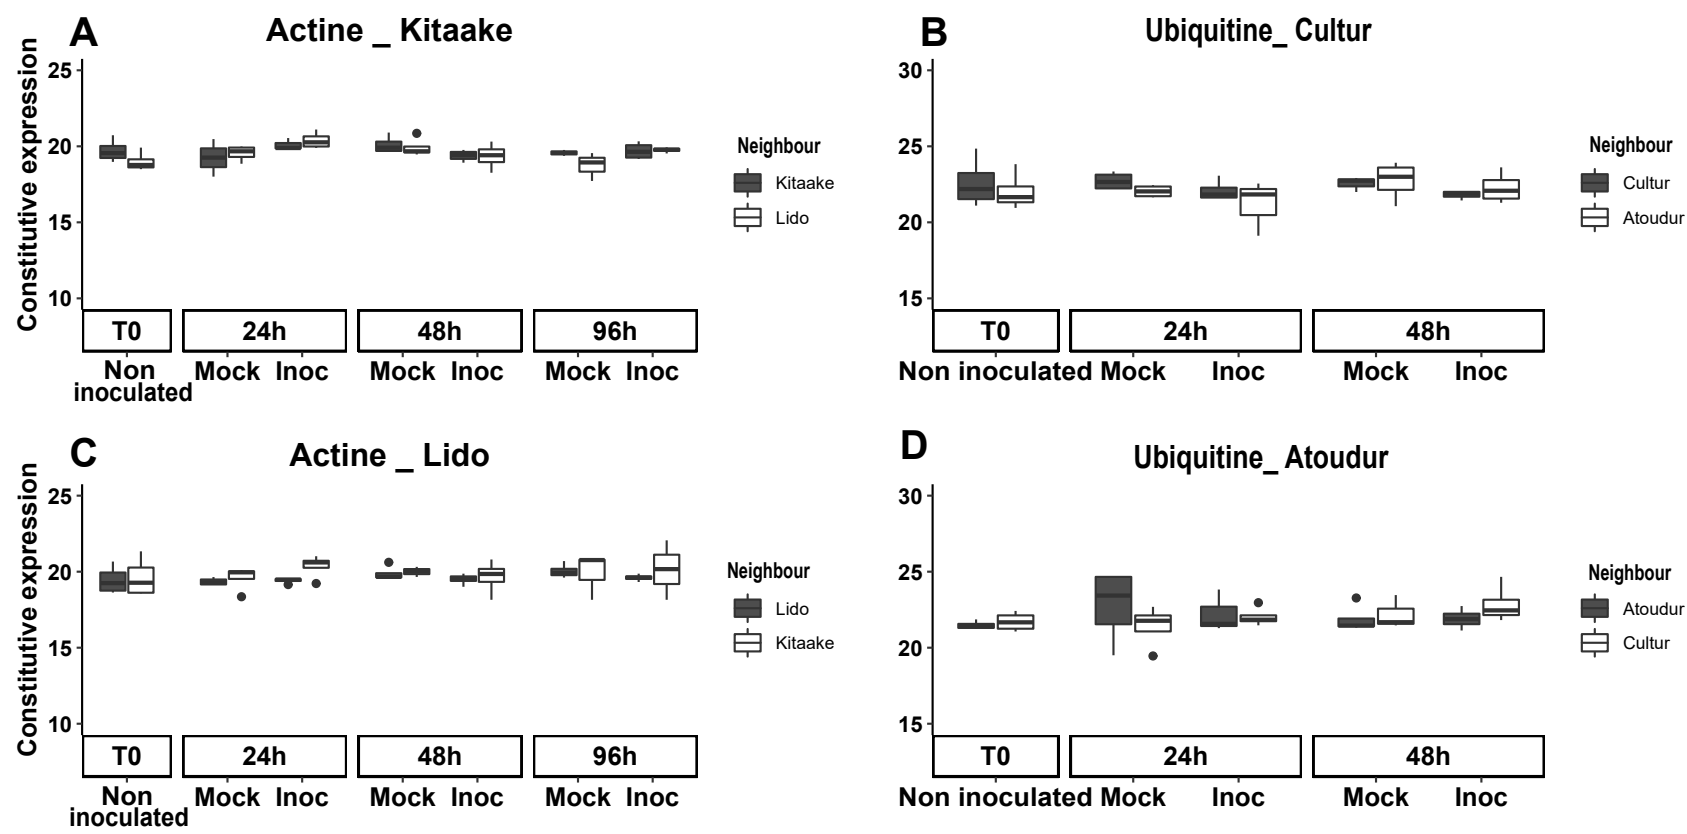

**Fig. S2 Expression of housekeeping genes**

Gene expression was measured in leaves of plants grown in pure (grey bars) or mixture conditions (white bars) in the same conditions presented in the Fig.5 et Supplementary Fig.S5. For rice, KIT (A) or LID (C) were grown with itself or in the presence of conspecific LID and KIT respectively. For wheat, CUL (B) or ATO (D) were grown with itself or in the presence of the conspecific neighbour ATO or CUL. The expression of each of housekeeping genes, actin (Os03g50890) and ubiquitin (CD921597) for rice and wheat respectively, was measured by Quantitative RT-PCR. The original CT obtained from 1:10 cDNA prepared with 5ug of RNA are shown. The mean  $\pm$  SE of at least 4 replicates is shown. Statistical groups were calculated by Tukey HSD test and no significant differences were found between groups (neighbour, time or inoculation) for each genotype.

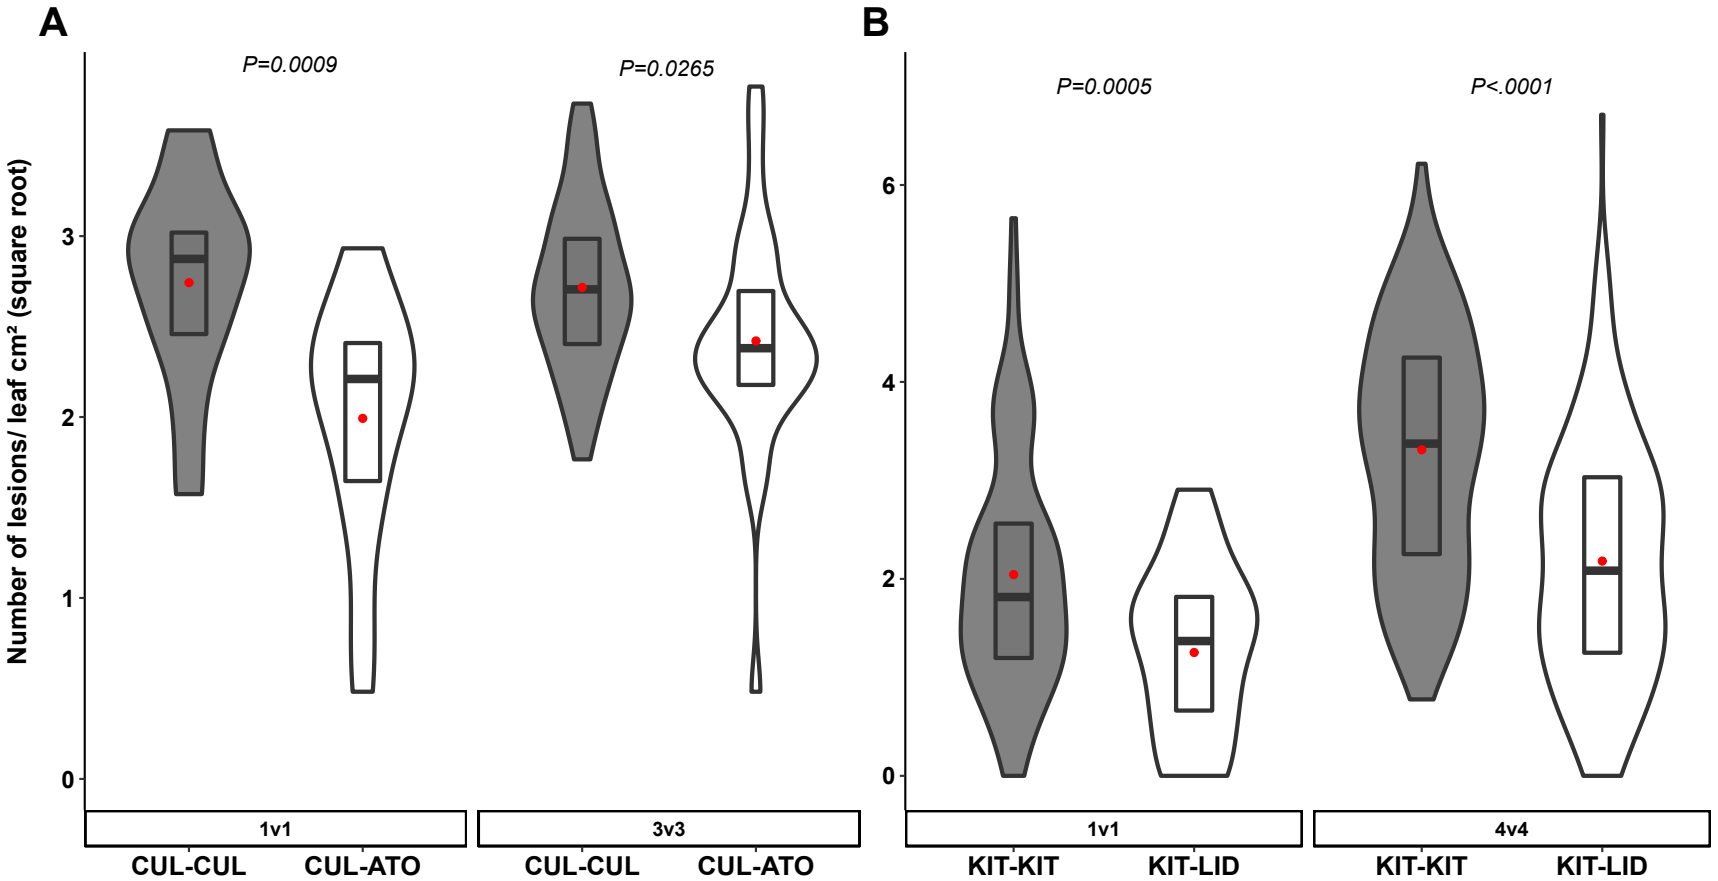

**Fig. S3 Evaluation of intra-genotypic and inter-genotypic contributions to plant-plant interactions.**

Mixture models of wheat (A) and rice (B) were put in conditions allowing inter-genotypic interactions (1v1: 1 focal plant and 1 neighbour) or intra- and inter genotypic interactions (3v3: 3 focal and 3 neighbour plants and 4v4: 4 focal and 4 neighbour plants). The volume of soil in 1v1 and 3v3 or 4v4 experiment was adjusted to maintain similar plant density. Mixtures and their controls were inoculated with the pathogen *P.triticina* for wheat and *M. oryzae* for rice. For wheat, the focal plant CULTUR was grown with itself (CUL-CUL) or in the presence of ATOUDUR conspecific neighbour (CUL-ATO). For rice, the focal plant KITAAKE was grown in the presence of itself (KIT-KIT) or in the presence of the conspecific neighbour LIDO (KIT-LID). Violin plots are representing the distribution of the data, the red dots represent the mean of the dataset. Each violin plots represented at least  $n=42$  (4v4) or  $n=18$  (1v1) plants for rice and  $n=36$  (3v3) or  $n=18$  (1v1) plants for wheat. At least 3 independent different experiments of 4 or 6 replicates each for wheat and rice respectively are shown. Statistical p values were determined according to ANOVA, followed by a Dunnett test on the linear model described in Methods.

# *Xanthomonas oryzae*

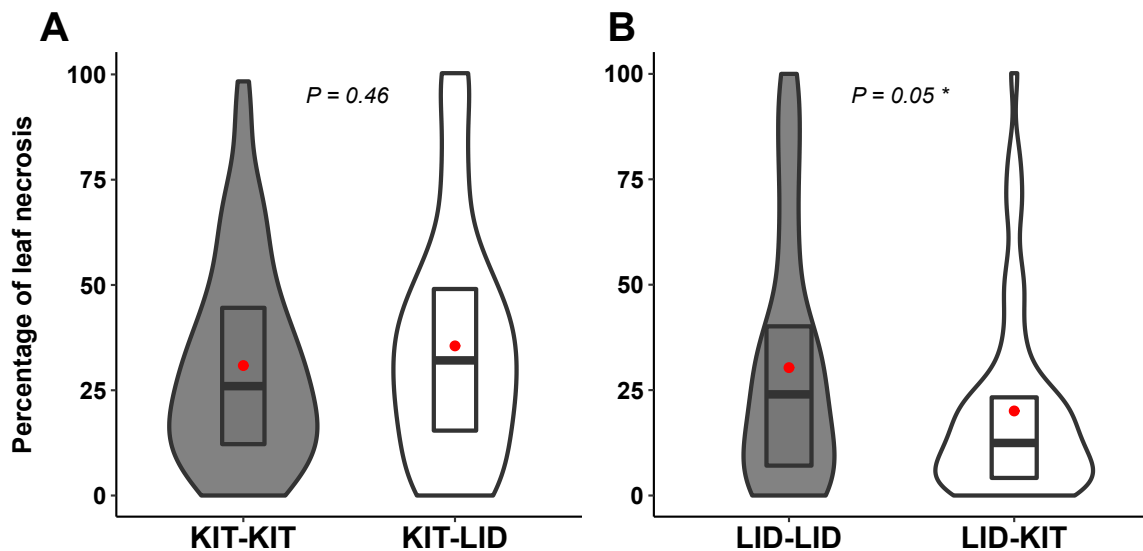

**Fig. S4 Response of selected intra-specific mixtures of rice on disease susceptibility to *Xanthomonas oryzae*.**

Rice plants in the mixture model between KITAAKE and LIDO were inoculated with the bacterial pathogen *Xanthomonas oryzae* pv. *oryzae* and lesion size was measured on each genotype in the presence of itself (KIT-KIT and LID-LID) or in the presence of its conspecific neighbour (KIT-LID and LID-KIT). Violin plots are representing the distribution of the data, the red dots represent the mean of the dataset. Each violin plots represented at least n=42 plants. At least 3 different experiments of 6 replicates each are shown. Statistical p values were determined according to ANOVA, on the linear model described in Methods .

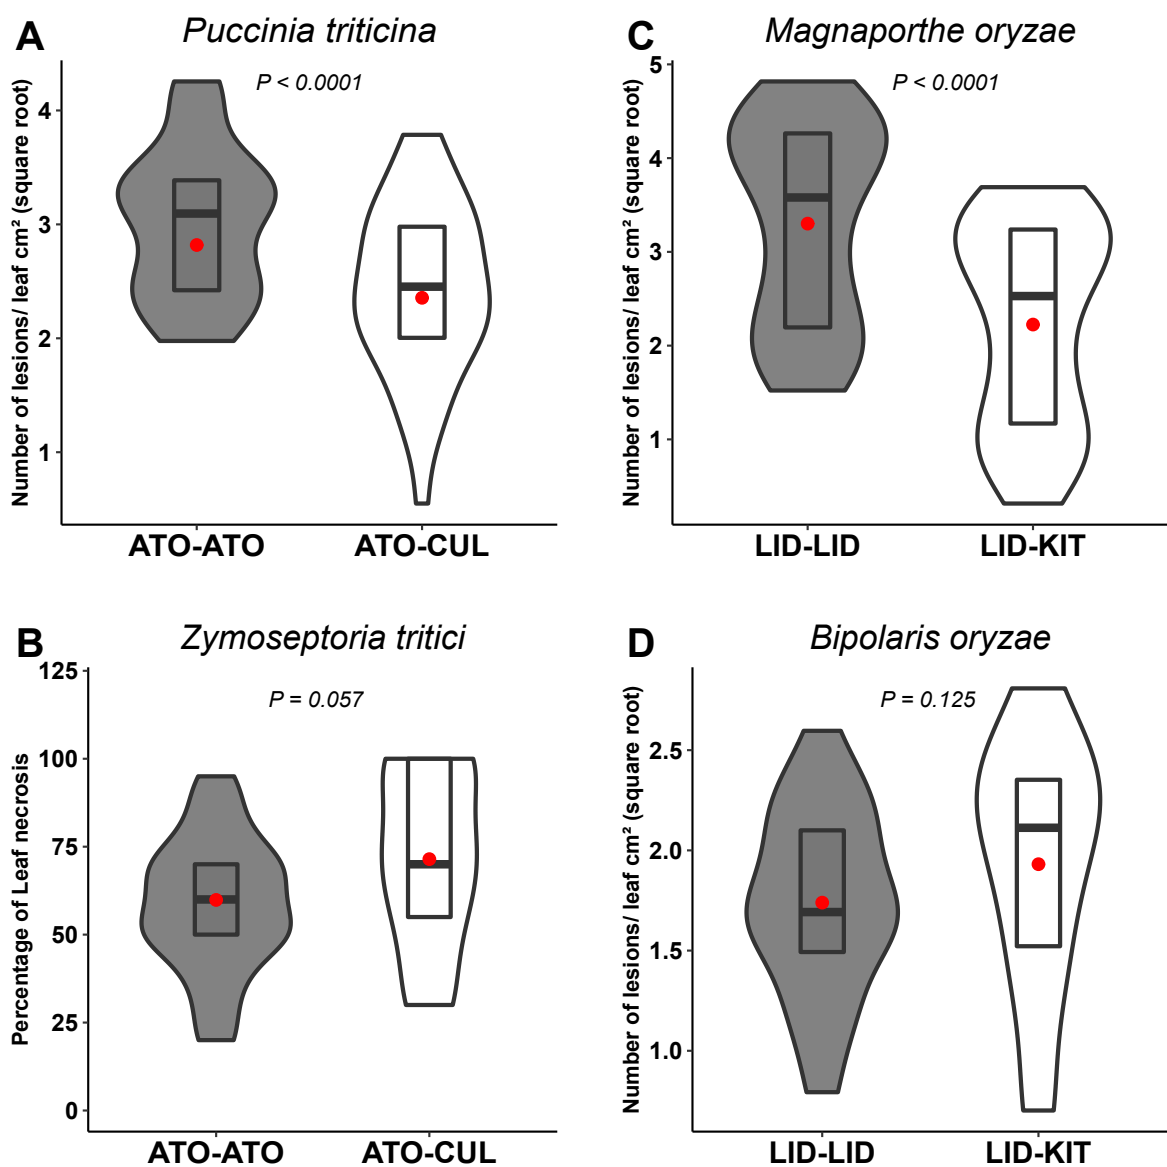

**Fig. S5. Effects of different pathogen lifestyles on responses of disease susceptibility in selected intra-specific mixtures in rice and wheat.**

Mixture models and their pure control were inoculated with the fungal pathogen indicated above each graph. For wheat (A and B), the focal plant ATOUUDUR was grown with itself (ATO-ATO) or in the presence of the conspecific neighbour CULTUR (ATO-CUL). For rice (C and D), the focal plant Lido was grown in the presence of itself (LID-LID) or in the presence of the conspecific neighbour KITAAKE (LID-KIT). Violin plots are representing the distribution of the data, the red dots represent the mean of the dataset. Each violin plots represented at least  $n=42$  plants for rice and  $n=36$  plants for wheat. At least 3 different experiments of 4 or 6 replicates each for wheat and rice respectively are shown. Statistical  $p$  values were determined according to ANOVA, on the linear model presented in Methods.

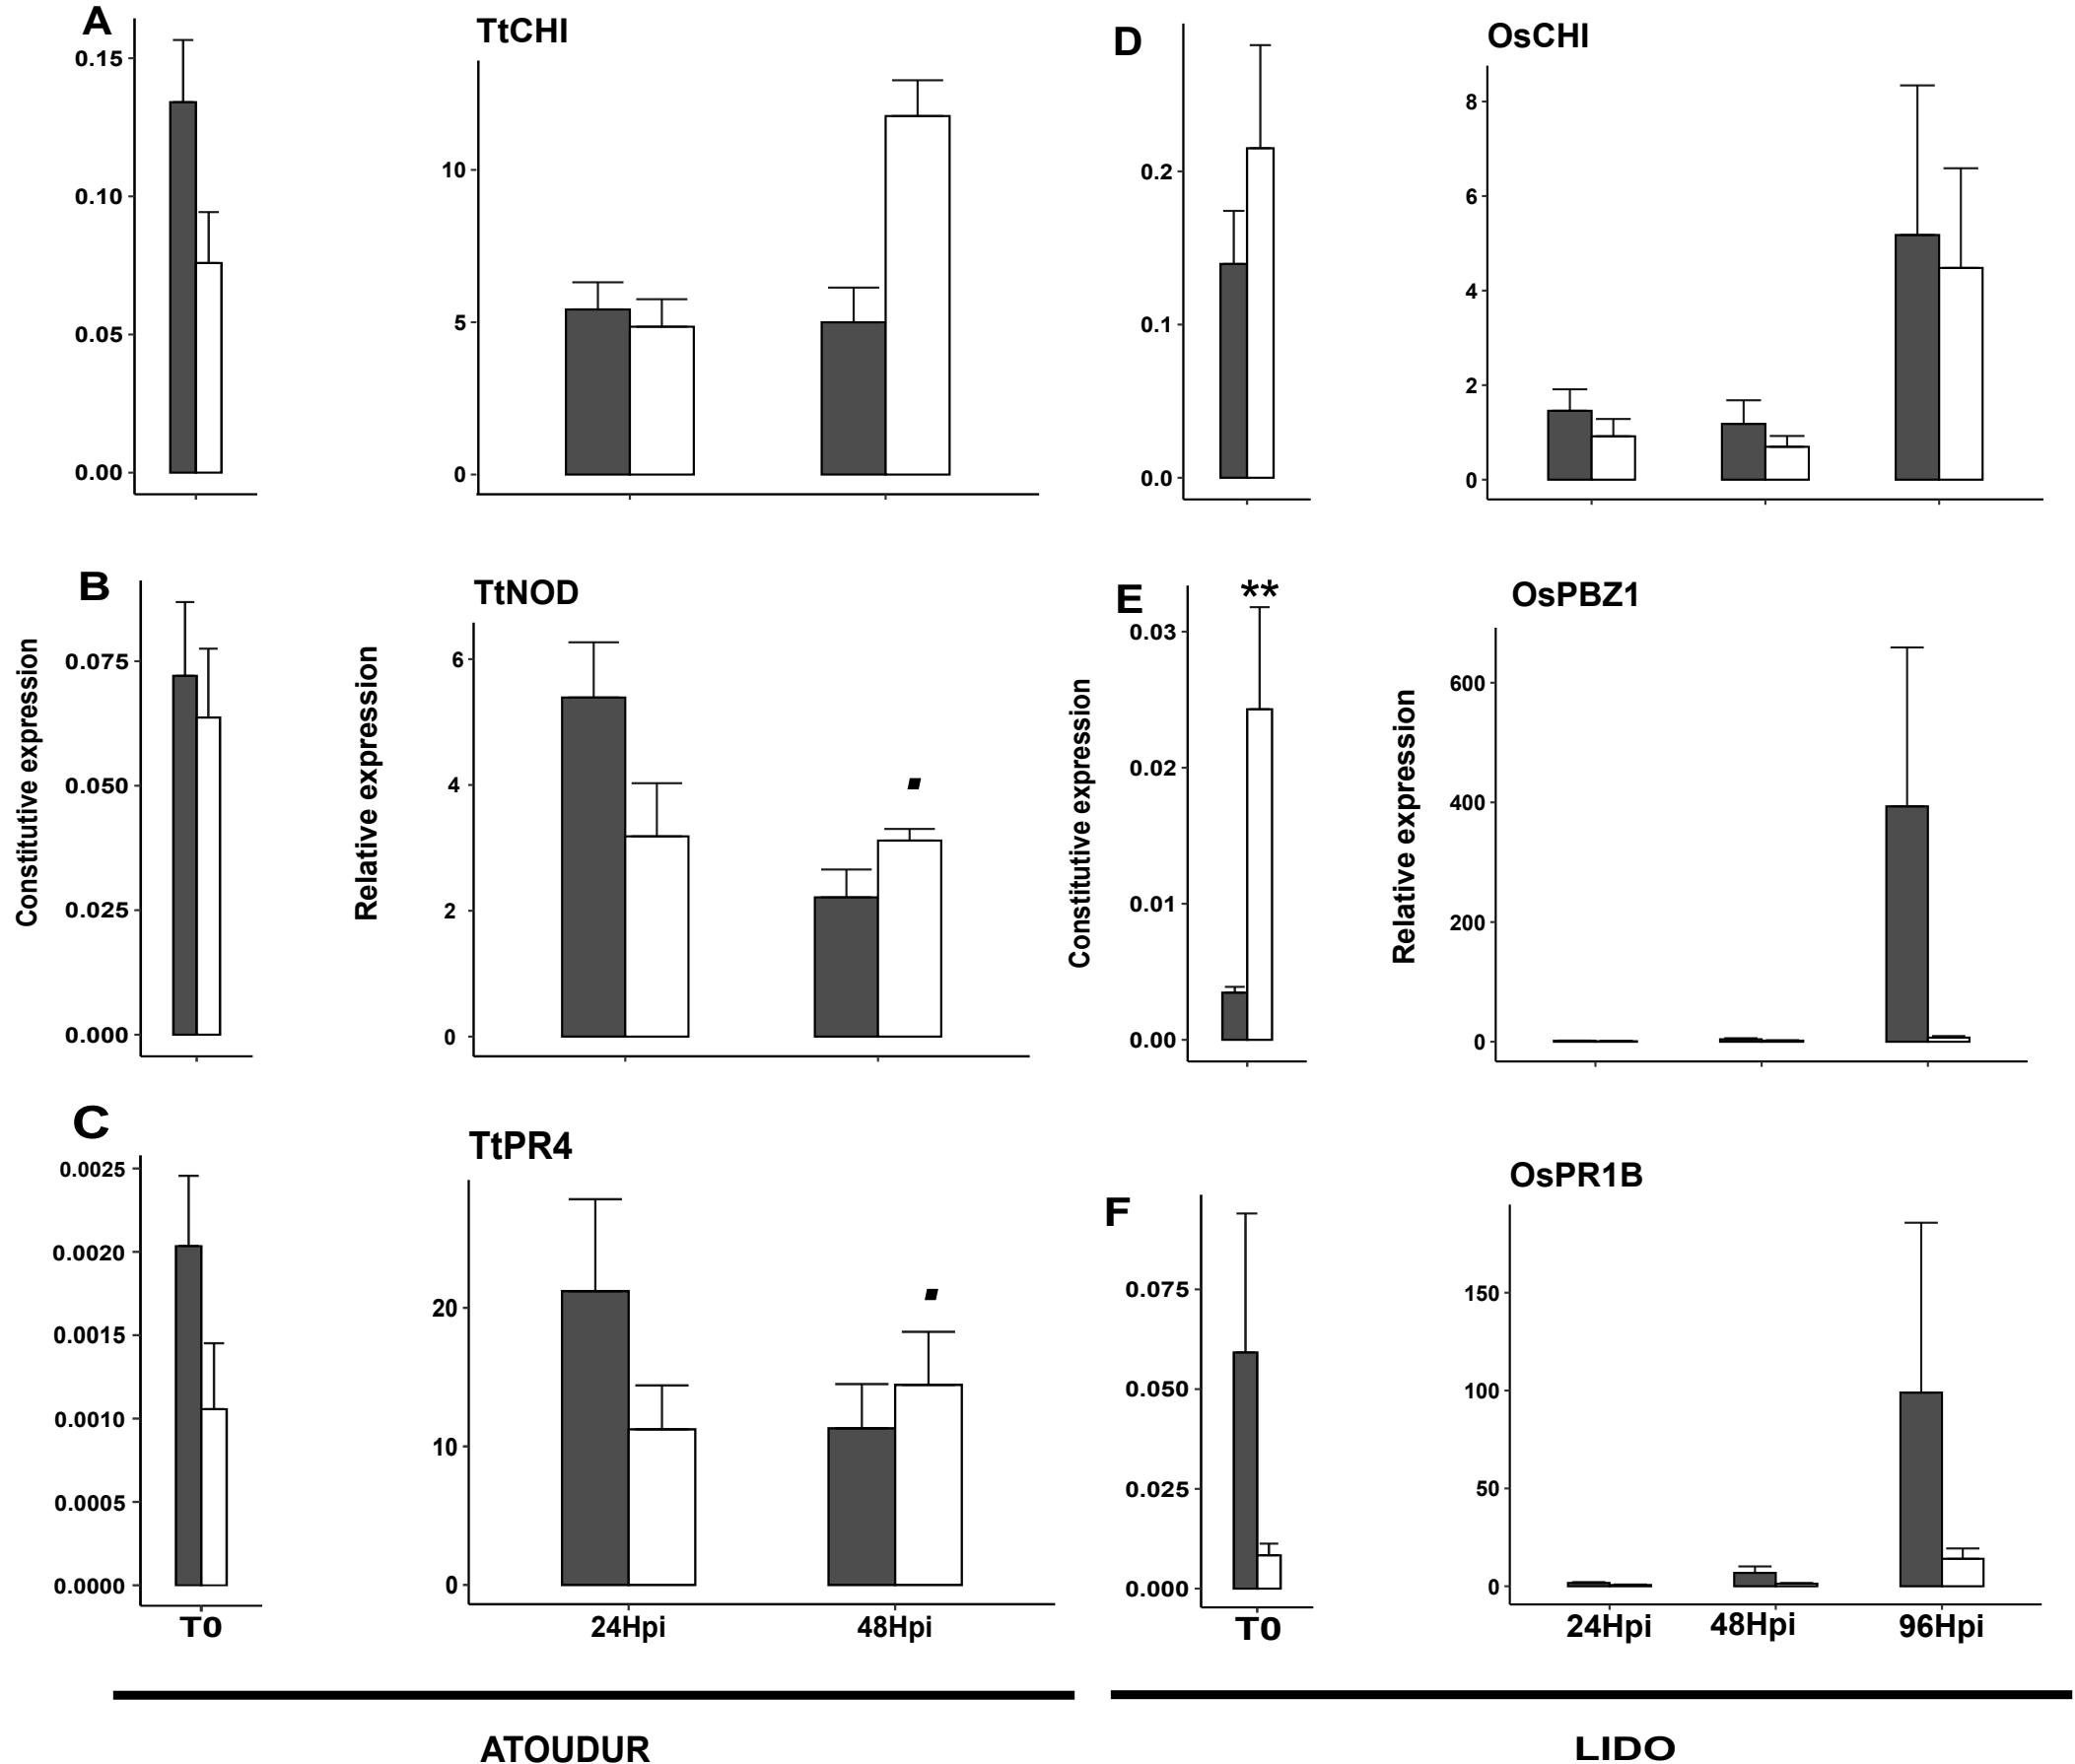

**Fig. S6. Expression of immunity-related genes in the wheat ATODUR genotype and the rice LIDO genotype when they were the focal plants (reciprocal data for Fig. 5).**

Gene expression was measured leaves of plants grown in Pure (grey bars) or mixtures (white bars). For wheat, Atoudur was grown with itself or in the presence of the conspecific neighbor Cultur (A, B and C). For rice, Lido was grown with itself or in the presence of conspecific Kitaake (D, E and F). For each graph, the name of the defense gene is indicated (*Tt* genes for wheat and *Os* genes for rice). Gene expression was measured by before infection (T0) and at different hours post inoculation (hpi) with *P. triticina* for wheat (24 and 48 hpi) and *M. oryzae* for rice (24, 48 and 96 hpi). The expression of each defense marker gene measured by Quantitative RT-PCR was normalized with actin and ubiquitin for rice and wheat respectively. For the expression data before inoculation (T0), the constitutive expression is shown while for time points after inoculation, a ratio of expression between inoculated and non-inoculated conditions is shown. The mean  $\pm$  SE of at least 6 replicates is shown. The statistical differences, as estimated by Wilcoxon tests, between conditions are shown for each time point (.:  $p < 0,1$ ; \*:  $p < 0,05$ ; \*\*:  $p < 0,01$ ). The data corresponding to the reciprocal genotypes considered as focal is provided in Fig.5.



**Table S1. Summary of the experiences and expected outcomes**

| Treatment                                                  | Outcomes awaited                                     | Pathogen           | Plant species | Focal tested | Neighbour                      |         |
|------------------------------------------------------------|------------------------------------------------------|--------------------|---------------|--------------|--------------------------------|---------|
| Screening experience (Fig.1)                               | Identification of pairs                              | Magnaporthe oryzae | Rice          | KITAAKE      | 9 different temperate japonica |         |
|                                                            |                                                      | Puccinia triticina | wheat         | CULTUR       | 9 different Durum wheat        |         |
| Inter genotypic experience (1v1) (Fig.S2)                  | Comparaison of intra and inter genotypic interaction | Magnaporthe oryzae | Rice          | KITAAKE      | LIDO                           |         |
|                                                            |                                                      | Puccinia triticina | wheat         | CULTUR       | ATOUDUR                        |         |
| Disease assesment (Fig.2, Fig.S3,S4)                       | Impact of mixture on disease susceptibility          | Magnaporthe oryzae | Rice          | KITAAKE      | LIDO                           |         |
|                                                            |                                                      |                    |               | LIDO         | KITAAKE                        |         |
|                                                            |                                                      | Bipolaris oryzae   |               | KITAAKE      | LIDO                           |         |
|                                                            |                                                      |                    |               | LIDO         | KITAAKE                        |         |
|                                                            |                                                      | Xanthomonas oryzae |               | KITAAKE      | LIDO                           |         |
|                                                            |                                                      |                    |               | LIDO         | KITAAKE                        |         |
|                                                            |                                                      | Puccinia triticina |               | wheat        | CULTUR                         | ATOUDUR |
|                                                            |                                                      |                    |               |              | ATOUDUR                        | CULTUR  |
| Zymoseptoria tritici                                       | CULTUR                                               | ATOUDUR            |               |              |                                |         |
|                                                            | ATOUDUR                                              | CULTUR             |               |              |                                |         |
| Soil sterilization (Fig.3)                                 | Implication of the root microbiota                   | Magnaporthe oryzae | Rice          |              | KITAAKE                        | LIDO    |
|                                                            |                                                      | Puccinia triticina | wheat         |              | CULTUR                         | ATOUDUR |
| Porus soil separation (Fig.3)                              | Requirement of root contact                          | Magnaporthe oryzae | Rice          |              | KITAAKE                        | LIDO    |
|                                                            |                                                      | Puccinia triticina | wheat         |              | CULTUR                         | ATOUDUR |
| Plastic soil separation (Fig.3)                            | Implication of soil compartment                      | Magnaporthe oryzae | Rice          | KITAAKE      | LIDO                           |         |
|                                                            |                                                      | Puccinia triticina | wheat         | CULTUR       | ATOUDUR                        |         |
| Neighbour uninfected (Fig.4)                               | Requirement for infected or uninfected neighbour     | Magnaporthe oryzae | Rice          | KITAAKE      | LIDO                           |         |
|                                                            |                                                      | Puccinia triticina | wheat         | CULTUR       | ATOUDUR                        |         |
| Neighbour inoculated and covered after inoculation (Fig.4) | Requirement of aerial contact communication          | Magnaporthe oryzae | Rice          | KITAAKE      | LIDO                           |         |
|                                                            |                                                      | Puccinia triticina | wheat         | CULTUR       | ATOUDUR                        |         |
| Transcriptomic analysis (Fig.5, Fig.S5)                    | Expression of defense gene in mixture                | Magnaporthe oryzae | Rice          | KITAAKE      | LIDO                           |         |
|                                                            |                                                      |                    |               | LIDO         | KITAAKE                        |         |
|                                                            |                                                      | Puccinia triticina |               | wheat        | CULTUR                         | ATOUDUR |
|                                                            |                                                      |                    |               |              | ATOUDUR                        | CULTUR  |

**Table S2. List of the durum wheat genotypes used in this study**

| <b>Name</b> | <b>Origin</b> | <b>Abreviation</b> |
|-------------|---------------|--------------------|
| ALEXIS      | FRANCE        | ALE                |
| ATOUDUR     | FRANCE        | ATO                |
| ARGELES     | FRANCE        | ARG                |
| CULTUR      | FRANCE        | CUL                |
| JANEIRO     | FRANCE        | JAN                |
| LIBERDUR    | FRANCE        | LIB                |
| GALADUR     | FRANCE        | GAL                |
| NEODUR      | FRANCE        | NEO                |
| OBELIX      | FRANCE        | OBE                |
| SCULPTUR    | FRANCE        | SCU                |



**Table S3. List of the temperate japonica rice genotypes used in this study**

| <b>Name</b> | <b>Origin</b> | <b>Abreviation</b> |
|-------------|---------------|--------------------|
| BOMBILLA    | Italy         | BOM                |
| CARINA      | Italy         | CAR                |
| GRITNA      | Italy         | GRI                |
| KING        | Italy         | KIN                |
| LIDO        | Italy         | LID                |
| LUXOR       | Italy         | LUX                |
| MARATELLI   | Italy         | MAR                |
| NIPPONBARE  | Japan         | NIP                |
| KITAAKE     | Japan         | KIT                |
| SALVO       | Italy         | SAL                |

**Table S4. List of the wheat genes used in this study**

| <b>Gene name</b>        | <b>Gene ID</b>     | <b>Primer sequence</b>                                |
|-------------------------|--------------------|-------------------------------------------------------|
| <i><b>Ubiquitin</b></i> | CD921597           | CTGGCGAGGATATGTTCCAT<br>TCGGATGGAAGACCTTTGTC          |
| <i><b>TtNOD</b></i>     | Ta.27299.1.S1_x_at | GCCGGTTGCACGAGTAAA<br>TTACGAAAAGCGGAAGAGGA            |
| <i><b>TtPR4</b></i>     | Ta.9226.1.S1_at    | ATAAAAGGCTAGCTAAAAGTAAGTTGA<br>TTTGAATAGATAACCCGTTTGG |
| <i><b>TtCHI</b></i>     | Ta.2784.1.A1_at    | TGCGCTACTGCAGCATACTC<br>ACCATACGAATCAACTGATCACA       |

**Table S5. List of the rice genes used in this study**

| <b>Gene name</b>     | <b>Gene ID</b> | <b>Primer sequence</b>                             |
|----------------------|----------------|----------------------------------------------------|
| <i><b>Actine</b></i> | Os03g50890     | GCGTGGACAAAGTTTTCAACCG<br>TCTGGTACCCTCATCAGGCATC   |
| <i><b>OsPBZ1</b></i> | Os12g36880     | CCTGCCGAATACGCCTAAGATG<br>AGAACACATTCAGACTTGCCTCTC |
| <i><b>OsPR1B</b></i> | Os01g28450     | CGAGAAGAGCGACTACGACTAC<br>GCCTCTGTCCGACGAAGTTG     |
| <i><b>OsCHI</b></i>  | Os07g35560     | TTAACGGCGCTGCTACCATT<br>TCCATCCTCTTACTGCCGA        |
